# Supplementary material for: Designing difluoro substituted benzene ring based fullerene free acceptors for small Naphthalene Di-Imide based molecules with DFT approaches
Source: Springer Nature journal article supplement (doi:10.1007/s11082-019-2047-x), 2019-09-30
Supplement: MOESM1 [file 17224808]

**Supporting Information**

**Designing difluoro substituted benzene ring based fullerene free acceptors for small naphthalene di-imide based molecules with DFT approaches**

*Usman Ali *[a], Ayesha Javed [a], Amanullah [b], Muhammad Shoaib [b], Muhammad Kashif [b], Ali Raza [c], Shi-Bo Cheng [d], Javed Iqbal [e]*

*[a, b] Department of Chemistry, University of Agriculture, Faisalabad, 38040, Pakistan.*

*[c] Department of Physics, University of Agriculture, Faisalabad, 38040, Pakistan.*

*[d] School of Chemistry and Chemical Engineering, Shandong University, Jinan 250100, People’s Republic of China.*

*[e] Punjab Bio-energy Institute, University of Agriculture, Faisalabad, 38040, Pakistan.*

Corresponding author E-mail: [usmanqureshi320@gmail.com](mailto:usmanqureshi320@gmail.com) (U.A), [javedaisha16@gmail.com](mailto:javedaisha16@gmail.com) (A. J).

**S 1.** Difference of dipole moment between the ground and excited states of reference and four newly designed fullerene free acceptors molecules.

**
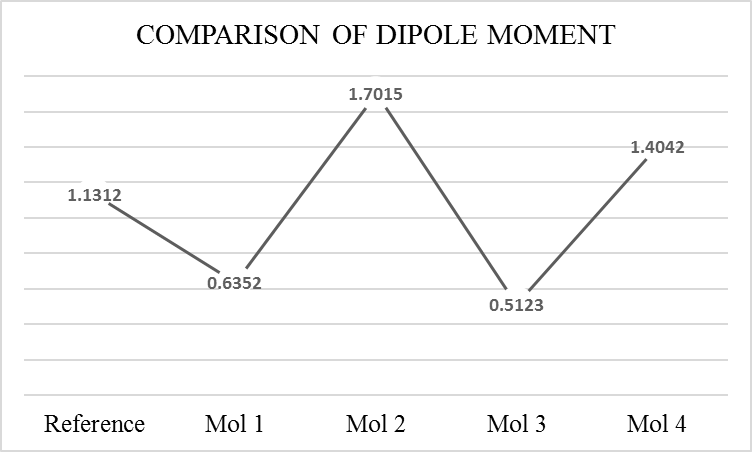
**

**S 2.** Electron (λ*e*) and Hole (λ*h*) re-organization energy of reference and four newly designed fullerene free acceptors molecules with **wB97xd** functional and **6-31 G (d,p)** basis set.


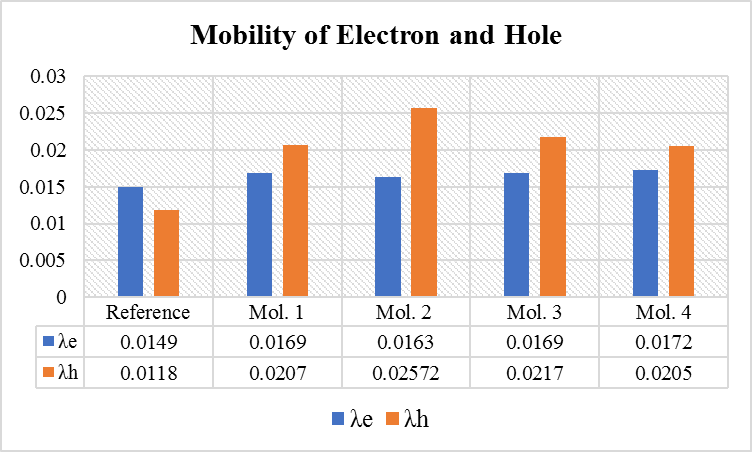


**
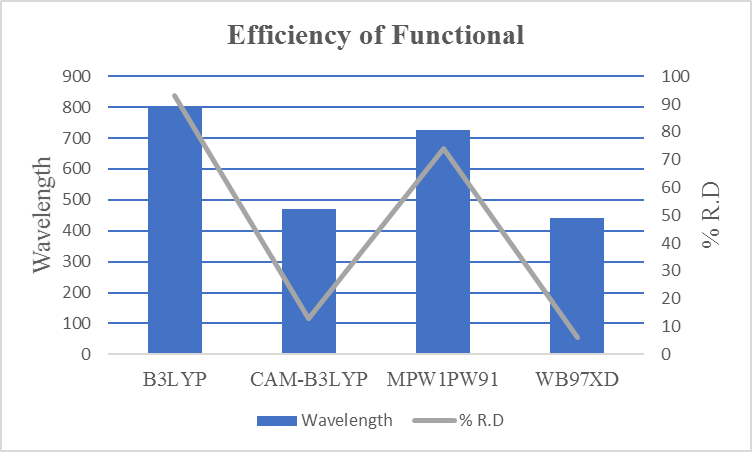
S 3.** Representation of % relative deviation (% R.D) of reference molecule with **B3LYP**, **CAM-B3LYP**, **MPW1PW91** and **wB97xd** functionals at **6-31 G (d,p)** basis set.

**S 4.** Comparing the λmax values and % R.D of four newly designed fullerene free acceptors molecules from the reference molecule in the chloroform solvent and IEFPCM model at **wB97xd/6-31 G (d,p)** level of theory.

**
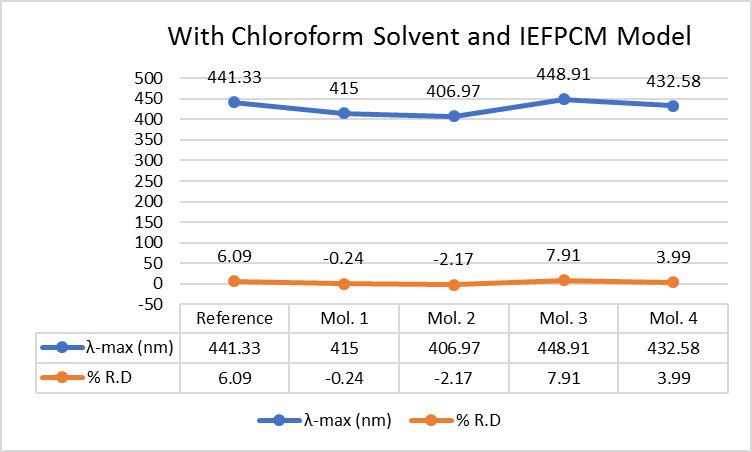
**

**
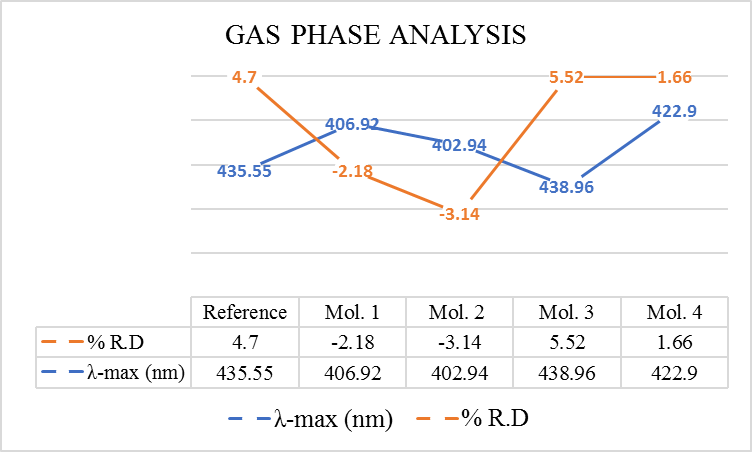
S 5.** Comparing the λmax values and % R.D of four newly designed fullerene free acceptors molecules from the reference molecule in the gas phase at **wB97xd/6-31 G (d,p)** level of theory

**S-6.** Fully Optimized 3D Structures of **R** and **Mol-1** to **Mol-4** at the ground states with **wb97xd/6-31 G (d,p)** level of density functional theory.

**
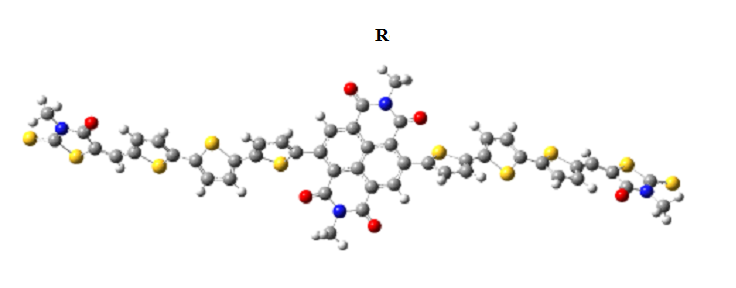
**

**
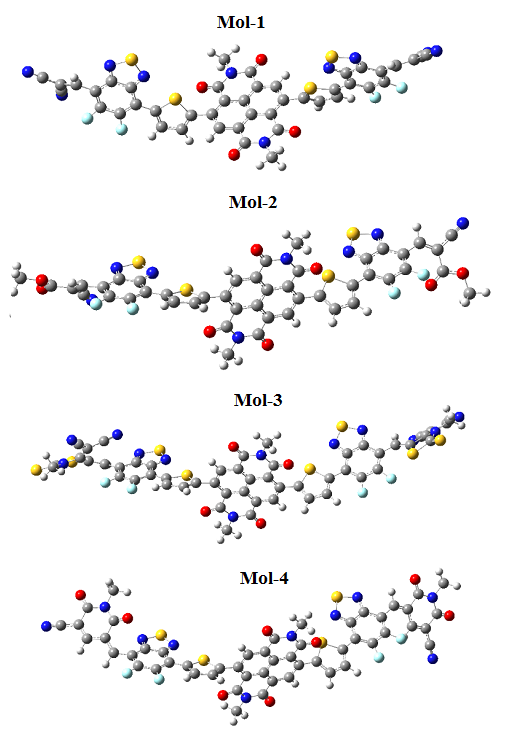
**
